# Supplementary material
Source: MDPI journal article supplement (https://www.mdpi.com/2075-4698/11/3/71)
Supplement: s1 [file s1]

Table S1 The Questionnaire about the impact of COVID-19 into the work, income and asylum procedures of Refugee Researchers

|                                                                                                                                                                                           |
|-------------------------------------------------------------------------------------------------------------------------------------------------------------------------------------------|
| <b>Choose your gender</b><br>Male<br>Female<br>Prefer not to say                                                                                                                          |
| <b>Age group</b><br>18-24<br>25-34<br>35-44<br>45-54<br>55-64<br>65-74                                                                                                                    |
| <b>Nationality</b>                                                                                                                                                                        |
| <b>Country of destination</b>                                                                                                                                                             |
| <b>Marital status</b><br>Married<br>Single<br>Divorced                                                                                                                                    |
| <b>Education level</b><br>Associate's degree<br>Bachelor's degree<br>Master's degree<br>Doctoral's degree                                                                                 |
| <b>Employment status</b><br>Working status<br>Student<br>Self-employed<br>Working in the family business<br>Entrepreneur<br>University/Research Institute<br>Public administration<br>NGO |
| <b>How would you describe your current income?</b><br>Living comfortably on present income<br>Coping on present income<br>Finding it difficult on present income                          |
| <b>Taking into consideration the current situation of COVID-19, how worried are you according to the current crisis?</b><br>1 (not at all efficient) - 5 (very efficient)                 |
| <b>To what extent do you feel affected by COVID-19 considering the following issues?</b>                                                                                                  |
| <b>Employment Status</b><br>Not affected at all<br>Moderately affected                                                                                                                    |

|                                                                                                                                                                                                                                                                         |
|-------------------------------------------------------------------------------------------------------------------------------------------------------------------------------------------------------------------------------------------------------------------------|
| Strongly affected                                                                                                                                                                                                                                                       |
| <b>Income</b><br>Not affected at all<br>Moderately affected<br>Strongly affected                                                                                                                                                                                        |
| <b>Health</b><br>Not affected at all<br>Moderately affected<br>Strongly affected                                                                                                                                                                                        |
| <b>In your opinion are the measurements taken by the public authorities efficient to reduce the spread of the virus in your current country?</b><br>1 (not worried at all) - 5 (totally worried)                                                                        |
| <b>Technology Ecosystem access</b><br>Laptop Personal Computer<br>Additional Display Monitor<br>High-speed Broadband<br>Productivity Software, e.g. Microsoft office<br>Collaboration software (either Skype, Zoom, Microsoft Teams)                                    |
| <b>Level of the challenge to adapt to a home office fulltime?</b><br>Highly challenging<br>Some moderate challenge<br>Little or no challenge                                                                                                                            |
| <b>What are the two main challenges faced?</b><br>Loss of feeling of a physical team<br>Loss of my physical built office space<br>Difficulty of staying productive<br>Difficulty of sticking to a working plan<br>Separating family and work hours                      |
| <b>Did you have a dedicated office space at home already?</b><br>Yes<br>Not                                                                                                                                                                                             |
| <b>Did your perception change since having to work from home fulltime?</b><br>Now more positive in their view of working from home<br>Now less positive in their view of working from home                                                                              |
| <b>What do you consider potential most positive influence/factor on productivity?</b>                                                                                                                                                                                   |
| <b>What do you consider the most negative influence/factor on productivity?</b>                                                                                                                                                                                         |
| <b>Change in value of having the right physical working space</b><br>Now thought it was now the more important element than previously thought<br>Always thought it was important<br>See technology more important                                                      |
| <b>What do you now think of the value Immersive Workspace tools that you could use?</b><br>Will have no impact on my productivity<br>Will increase my collaboration with others<br>Will increase my want and ability to work from home<br>Will increase my productivity |

**Do you believe that the procedures for the Asylum seekers are affected negatively  
be the COVID-19 circumstances?**

Yes

No

**Table S2:** Current income and marital status**Cross-tabulation analysis: “How would you describe your current income ?” \* Marital status**

|                                              |                                        | Marital status          |         |        | Total  |
|----------------------------------------------|----------------------------------------|-------------------------|---------|--------|--------|
|                                              |                                        | Divorced                | Married | Single |        |
| How would you describe your current income ? | Finding it difficult on present income | Count                   | 0       | 10     | 20     |
|                                              |                                        | % within Marital status | 0,0%    | 37,0%  | 57,1%  |
|                                              | Coping on present income               | Count                   | 2       | 7      | 8      |
|                                              |                                        | % within Marital status | 100,0%  | 25,9%  | 22,9%  |
|                                              | Living comfortably on present income   | Count                   | 0       | 10     | 7      |
|                                              |                                        | % within Marital status | 0,0%    | 37,0%  | 20,0%  |
| Total                                        | Count                                  | 2                       | 27      | 35     | 64     |
|                                              | % within Marital status                | 100,0%                  | 100,0%  | 100,0% | 100,0% |

**Chi-Square Tests**

|                    | Value              | df | Asymptotic<br>Significance (2-<br>sided) |
|--------------------|--------------------|----|------------------------------------------|
| Pearson Chi-Square | 8,742 <sup>a</sup> | 4  | ,068                                     |
| Likelihood Ratio   | 8,446              | 4  | ,077                                     |
| N of Valid Cases   | 64                 |    |                                          |

a. 3 cells (33,3%) have expected count less than 5. The minimum expected count is ,53.

**Symmetric Measures**

|                    | Value      | Approximate<br>Significance |
|--------------------|------------|-----------------------------|
| Nominal by Nominal | Phi        | ,370                        |
|                    | Cramer's V | ,261                        |
| N of Valid Cases   | 64         |                             |

Table S3: How much income has been affected during crisis, broken down by Marital status

Cross-tabulation analysis:– “To what extent do you feel affected by COVID-19 considering your income?” \* Marital status

|        |                         |                         | Marital status |         |        |       |
|--------|-------------------------|-------------------------|----------------|---------|--------|-------|
|        |                         |                         | Divorced       | Married | Single | Total |
| Income | Moderately affected     | Count                   | 1              | 6       | 11     | 18    |
|        |                         | % within Marital status | 50,0%          | 22,2%   | 31,4%  | 28,1% |
|        | Not affected at all     | Count                   | 1              | 8       | 8      | 17    |
|        |                         | % within Marital status | 50,0%          | 29,6%   | 22,9%  | 26,6% |
|        | Strongly affected       | Count                   | 0              | 13      | 16     | 29    |
|        |                         | % within Marital status | 0,0%           | 48,1%   | 45,7%  | 45,3% |
| Total  | Count                   | 2                       | 27             | 35      | 64     |       |
|        | % within Marital status | 100,0%                  | 100,0%         | 100,0%  | 100,0% |       |

### Chi-Square Tests

|                    | Value              | df | Asymptotic<br>Significance (2-<br>sided) |
|--------------------|--------------------|----|------------------------------------------|
| Pearson Chi-Square | 2,456 <sup>a</sup> | 4  | ,653                                     |
| Likelihood Ratio   | 3,238              | 4  | ,519                                     |
| N of Valid Cases   | 64                 |    |                                          |

a. 3 cells (33,3%) have expected count less than 5. The minimum expected count is ,53.

### Symmetric Measures

|                    |            | Value | Approximate<br>Significance |
|--------------------|------------|-------|-----------------------------|
| Nominal by Nominal | Phi        | ,196  | ,653                        |
|                    | Cramer's V | ,139  | ,653                        |
| N of Valid Cases   |            | 64    |                             |

Table S4: How much income has been affected during crisis, broken down by Educational level

Cross-tabulation analysis: Education status – “To what extent do you feel affected by COVID-19 considering your income?”

|        |                                             |                                             | Education (highest level attended) |          |        |       |
|--------|---------------------------------------------|---------------------------------------------|------------------------------------|----------|--------|-------|
|        |                                             |                                             | Associate/Bachelor                 |          |        |       |
|        |                                             |                                             | or                                 | Master's | PhD    | Total |
| Income | Not affected at all                         | Count                                       | 4                                  | 7        | 6      | 17    |
|        |                                             | % within Education (highest level attended) | 16,0%                              | 25,9%    | 50,0%  | 26,6% |
|        | moderately affected                         | Count                                       | 6                                  | 9        | 3      | 18    |
|        |                                             | % within Education (highest level attended) | 24,0%                              | 33,3%    | 25,0%  | 28,1% |
|        | strongly affected                           | Count                                       | 15                                 | 11       | 3      | 29    |
|        |                                             | % within Education (highest level attended) | 60,0%                              | 40,7%    | 25,0%  | 45,3% |
| Total  | Count                                       | 25                                          | 27                                 | 12       | 64     |       |
|        | % within Education (highest level attended) | 100,0%                                      | 100,0%                             | 100,0%   | 100,0% |       |

### Chi-Square Tests

|                              | Value              | df | Asymptotic Significance (2-sided) |
|------------------------------|--------------------|----|-----------------------------------|
| Pearson Chi-Square           | 6,397 <sup>a</sup> | 4  | ,171                              |
| Likelihood Ratio             | 6,158              | 4  | ,188                              |
| Linear-by-Linear Association | 5,603              | 1  | ,018                              |
| N of Valid Cases             | 64                 |    |                                   |

a. 2 cells (22,2%) have expected count less than 5. The minimum expected count is 3,19.

### Symmetric Measures

|                          | Value | Asymptotic Standard Error <sup>a</sup> | Approximate T <sup>b</sup> | Approximate Significance |
|--------------------------|-------|----------------------------------------|----------------------------|--------------------------|
| Ordinal by Ordinal Gamma | -,404 | ,156                                   | -2,431                     | ,015                     |
| N of Valid Cases         | 64    |                                        |                            |                          |

a. Not assuming the null hypothesis.

b. Using the asymptotic standard error assuming the null hypothesis.

**Table S5:** Adaptation to working from home versus Age

**Level of the challenge to adapt to a home office fulltime? \* Two age groups Crosstabulation**

|                                                            |                         |                         | Two age groups |        |        |
|------------------------------------------------------------|-------------------------|-------------------------|----------------|--------|--------|
|                                                            |                         |                         | 18-34          | 35+    | Total  |
| Level of the challenge to adapt to a home office fulltime? | Highly challenging      | Count                   | 18             | 7      | 25     |
|                                                            |                         | % within Two age groups | 39,1%          | 38,9%  | 39,1%  |
|                                                            | Little or no challenge  | Count                   | 6              | 3      | 9      |
|                                                            |                         | % within Two age groups | 13,0%          | 16,7%  | 14,1%  |
|                                                            | Some moderate challenge | Count                   | 22             | 8      | 30     |
|                                                            |                         | % within Two age groups | 47,8%          | 44,4%  | 46,9%  |
| Total                                                      | Count                   |                         | 46             | 18     | 64     |
|                                                            | % within Two age groups |                         | 100,0%         | 100,0% | 100,0% |

**Chi-Square Tests**

|                    | Value             | df | Asymptotic<br>Significance (2-sided) |
|--------------------|-------------------|----|--------------------------------------|
| Pearson Chi-Square | ,153 <sup>a</sup> | 2  | ,927                                 |
| Likelihood Ratio   | ,149              | 2  | ,928                                 |
| N of Valid Cases   | 64                |    |                                      |

a. 1 cells (16,7%) have expected count less than 5. The minimum expected count is 2,53.

**Table S6:** Attitude towards fulltime work from home vs Age

**Did your perception change since having to work from home fulltime? \* Two age groups**  
**Crosstabulation**

|                                                                     |                                                      |                         | Two age groups |        | Total  |
|---------------------------------------------------------------------|------------------------------------------------------|-------------------------|----------------|--------|--------|
|                                                                     |                                                      |                         | 18-34          | 35+    |        |
| Did your perception change since having to work from home fulltime? | Now less positive in their view of working from home | Count                   | 30             | 11     | 41     |
|                                                                     |                                                      | % within Two age groups | 65,2%          | 61,1%  | 64,1%  |
|                                                                     | Now more positive in their view of working from home | Count                   | 16             | 7      | 23     |
|                                                                     |                                                      | % within Two age groups | 34,8%          | 38,9%  | 35,9%  |
| Total                                                               |                                                      | Count                   | 46             | 18     | 64     |
|                                                                     |                                                      | % within Two age groups | 100,0%         | 100,0% | 100,0% |

|                                    | Value             | df | Asymptotic Significance (2-sided) |
|------------------------------------|-------------------|----|-----------------------------------|
| Pearson Chi-Square                 | ,095 <sup>a</sup> | 1  | ,758                              |
| Continuity Correction <sup>b</sup> | ,000              | 1  | ,986                              |
| Likelihood Ratio                   | ,094              | 1  | ,759                              |
| Fisher's Exact Test                |                   |    |                                   |
| N of Valid Cases                   | 64                |    |                                   |



**Table S7:** Impact of lockdown on income by working sector**Income \* Working sector in two categories Crosstabulation**

|        |                                           |                                           | Working sector in two categories |                         | Total  |
|--------|-------------------------------------------|-------------------------------------------|----------------------------------|-------------------------|--------|
|        |                                           |                                           | University/Research Institute    | student or Non-academic |        |
| Income | Not affected at all                       | Count                                     | 10                               | 7                       | 17     |
|        |                                           | % within Working sector in two categories | 52,6%                            | 15,6%                   | 26,6%  |
|        | moderately affected                       | Count                                     | 5                                | 13                      | 18     |
|        |                                           | % within Working sector in two categories | 26,3%                            | 28,9%                   | 28,1%  |
|        | strongly affected                         | Count                                     | 4                                | 25                      | 29     |
|        |                                           | % within Working sector in two categories | 21,1%                            | 55,6%                   | 45,3%  |
| Total  | Count                                     |                                           | 19                               | 45                      | 64     |
|        | % within Working sector in two categories |                                           | 100,0%                           | 100,0%                  | 100,0% |

**Chi-Square Tests**

|                              | Value               | df | Asymptotic Significance (2-sided) |
|------------------------------|---------------------|----|-----------------------------------|
| Pearson Chi-Square           | 10,455 <sup>a</sup> | 2  | ,005                              |
| Likelihood Ratio             | 10,275              | 2  | ,006                              |
| Linear-by-Linear Association | 9,856               | 1  | ,002                              |
| N of Valid Cases             | 64                  |    |                                   |

a. 0 cells (0,0%) have expected count less than 5. The minimum expected count is 5,05.

**Symmetric Measures**

|                    |            | Value | Approximate Significance |
|--------------------|------------|-------|--------------------------|
| Nominal by Nominal | Phi        | ,404  | ,005                     |
|                    | Cramer's V | ,404  | ,005                     |
| N of Valid Cases   |            | 64    |                          |

**Table S8:** Impact of lockdown on employment by working sector

### Employment status \* Working sector in two categories Crosstabulation

|                   |                                           |                                           | Working sector in two categories |                         | Total  |
|-------------------|-------------------------------------------|-------------------------------------------|----------------------------------|-------------------------|--------|
|                   |                                           |                                           | University/Research Institute    | student or Non-academic |        |
| Employment status | Employed                                  | Count                                     | 14                               | 19                      | 33     |
|                   |                                           | % within Working sector in two categories | 73,7%                            | 42,2%                   | 51,6%  |
|                   | Unemployed                                | Count                                     | 5                                | 26                      | 31     |
|                   |                                           | % within Working sector in two categories | 26,3%                            | 57,8%                   | 48,4%  |
| Total             | Count                                     |                                           | 19                               | 45                      | 64     |
|                   | % within Working sector in two categories |                                           | 100,0%                           | 100,0%                  | 100,0% |

### Chi-Square Tests

|                                    | Value              | df | Asymptotic Significance (2-sided) | Exact Sig. (2-sided) | Exact Sig. (1-sided) |
|------------------------------------|--------------------|----|-----------------------------------|----------------------|----------------------|
| Pearson Chi-Square                 | 5,295 <sup>a</sup> | 1  | ,021                              |                      |                      |
| Continuity Correction <sup>b</sup> | 4,110              | 1  | ,043                              |                      |                      |
| Likelihood Ratio                   | 5,470              | 1  | ,019                              |                      |                      |
| Fisher's Exact Test                |                    |    |                                   | ,029                 | ,020                 |
| N of Valid Cases                   | 64                 |    |                                   |                      |                      |

a. 0 cells (0,0%) have expected count less than 5. The minimum expected count is 9,20.

b. Computed only for a 2x2 table

### Symmetric Measures

|                    |            | Value | Approximate Significance |
|--------------------|------------|-------|--------------------------|
| Nominal by Nominal | Phi        | ,288  | ,021                     |
|                    | Cramer's V | ,288  | ,021                     |
| N of Valid Cases   |            | 64    |                          |
